# Supplementary material
Source: HighWire-hosted journal article supplement (http://www.ajnr.org/highwire/filestream/52691/field_highwire_adjunct_files/0/14-00651.pdf)
Supplement: 14-00651.pdf [file 14-00651.pdf]

**On-line Table 1: Patient and aneurysm characteristics and follow-up data**

| Patient and Aneurysm Characteristics |         | Treatment |             |            |                                                                                | Follow-Up: Clinical     |    |               | Follow-Up: Imaging |                                      |                                                          |                   |                                                                                               |                    |                         |             |                  |
|--------------------------------------|---------|-----------|-------------|------------|--------------------------------------------------------------------------------|-------------------------|----|---------------|--------------------|--------------------------------------|----------------------------------------------------------|-------------------|-----------------------------------------------------------------------------------------------|--------------------|-------------------------|-------------|------------------|
|                                      |         | FD        |             |            |                                                                                | DSA: Aneurysm Occlusion |    |               | MRI                |                                      |                                                          |                   |                                                                                               |                    |                         |             |                  |
| Patient No.                          | Age (y) | Sex       | Location    | History    | Symptoms                                                                       | Type                    | n  | Diameter (mm) | Complication       | Time Elapsed From Treatment to Death | Cause of Death                                           | 3 mo              | 6 mo                                                                                          | 12 mo              | Time of Last Study (mo) | Mass Effect | Signal Intensity |
| 1                                    | 57      | Male      | VB junction | Unruptured | Loss of consciousness, tetraparesis                                            | NA                      | NA | NA            | NA                 | 7 days                               | Brain stem infarct                                       | NA                | NA                                                                                            | NA                 | NA                      | NA          | NA               |
| 2                                    | 59      | Male      | VB junction | Unruptured | Lower cranial nerve palsies, hemiparesis, elevated ICP caused by hydrocephalus | Surpass                 | 2  | 5             | Aneurysm rupture   | 7 days                               | SAH                                                      | NA                | NA                                                                                            | NA                 | NA                      | NA          | NA               |
| 3                                    | 57      | Male      | MCA         | Unruptured | Hemiparesis, aphasia                                                           | PED                     | 2  | 3.5, 4.5      | None               | 6 mo                                 | M2 branch occlusion distal to PED, MCA territory infarct | —                 | Incomplete aneurysm occlusion, NA occlusion of M2 branch and aneurysmal dilation of its stump | NA                 | 3                       | Unchanged   | Unchanged        |
| 4                                    | 61      | Male      | VB junction | Unruptured | Lower cranial nerve palsies, hemiparesis, elevated ICP due to hydrocephalus    | Surpass                 | 3  | 4.0, 4.0, 4.0 | None               | 9 mo                                 | Brain stem infarct                                       | —                 | Unchanged                                                                                     | NA                 | 5                       | Unchanged   | Unchanged        |
| 5                                    | 64      | Male      | ICA         | Unruptured | Hemiparesis                                                                    | PED                     | 3  | 3.5, 4.5, 4.5 | None               | 13 mo                                | PED thrombosis, ICA occlusion, MCA territory infarct     | Partial occlusion | Partial occlusion                                                                             | Complete occlusion | 9                       | Unchanged   | Unchanged        |

**Note:**—ICP indicates intracranial pressure; NA, not available; VB, vertebrasilar junction.

**On-line Table 2: Histopathologic findings**

| Patient No. | Aneurysm Location | Time of Removal after Treatment | Luminal Surface of FD                    |            |                      | Inside Aneurysm    |                             |                             | Aneurysm Wall |                                |              |
|-------------|-------------------|---------------------------------|------------------------------------------|------------|----------------------|--------------------|-----------------------------|-----------------------------|---------------|--------------------------------|--------------|
|             |                   |                                 | Inside Normal Parent Artery              | Inside GFA | Unorganized Thrombus | Organized Thrombus | Smooth Muscle Cell Invasion | Connective Tissue Formation | Structure     | Smooth Muscle Cells Visualized | Inflammation |
| 1           | VB junction       | NA                              | NA                                       | NA         | Yes                  | No                 | No                          | No                          | Structured    | Yes                            | No           |
| 2           | VB junction       | 7 days                          | Fibrin                                   | Fibrin     | Yes                  | No                 | No                          | No                          | Fragmented    | No                             | No           |
| 3           | MCA               | 6 mo                            | Neointima, single-cell endothelial layer | Fibrin     | Yes                  | No                 | No                          | No                          | Fragmented    | No                             | Yes          |
| 4           | VB junction       | 9 mo                            | Neointima                                | Fibrin     | Yes                  | No                 | No                          | No                          | Fragmented    | No                             | Yes          |
| 5           | ICA               | 13 mo                           | Neointima                                | Fibrin     | Yes                  | No                 | No                          | No                          | Fragmented    | No                             | Yes          |

**Note:**—VB indicates vertebrasilar.
